# Supplementary material for: Ba3YB3O9based phosphor ceramic plates with excellent thermal stability for wLED applications
Source: Royal Society of Chemistry journal article supplement (doi:10.1039/d1dt00194a), 2021-01-01
Supplement: d1dt00194a1.pdf [file d1dt00194a1.pdf]

## Ba<sub>3</sub>YB<sub>3</sub>O<sub>9</sub> based phosphor ceramic plates with excellent thermal stability for wLEDs applications

Weiwei Wu<sup>1</sup>, Yuanpeng Zhang<sup>2</sup>, Yuepin Zhang<sup>1,\*</sup>, and Jianxu Hu<sup>1,\*</sup>

<sup>1</sup>Key laboratory of Photo-electronic Materials, Ningbo University, Ningbo, Zhejiang, 315211, China

<sup>2</sup>Oak Ridge National Laboratory, 1 Bethel Valley Rd, Oak Ridge, TN 37830, USA

### **Supporting Information**

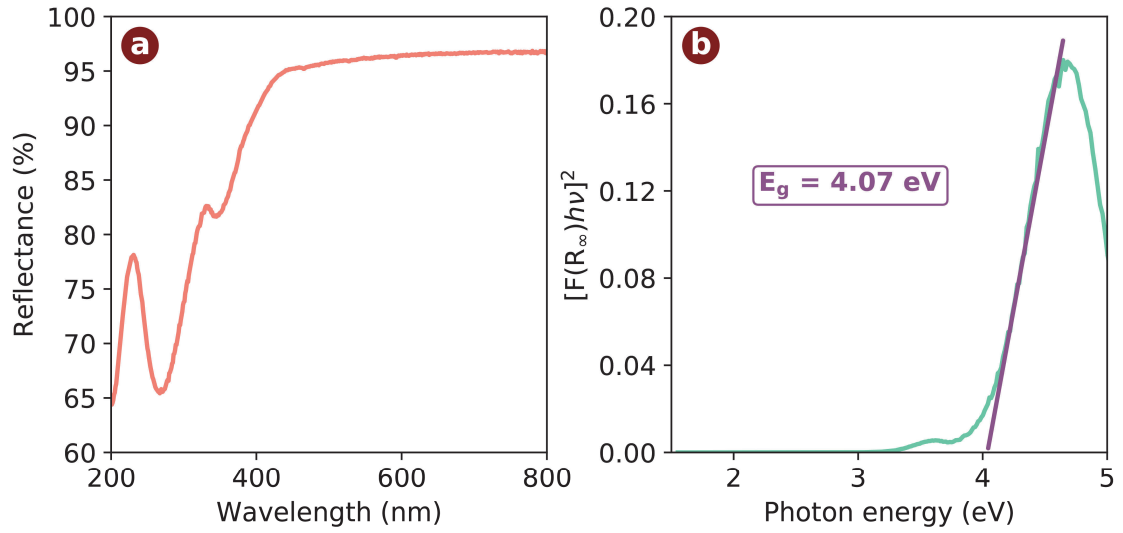

**Fig. S1** (a) Diffuse reflectance spectra of undoped  $\text{Ba}_3\text{YB}_3\text{O}_9$  phosphor. (b) The dependence of  $[F(R_\infty)hv]^2$  on the photon energy  $hv$ .

The energy gap ( $E_g$ ) of  $\text{Ba}_3\text{YB}_3\text{O}_9$  phosphor can be evaluated by the following equation:

$$[F(R_\infty)hv]^n = A(hv - E_g)$$

Where  $hv$  denotes photon energy,  $A$  is a proportional constant,  $n$  equals to 2 for direct allowed transition.  $F(R_\infty)$  is the Kubelka-Munk function, which can be expressed as:

$$[F(R_\infty)] = (1 - R)^2/2R$$

where  $R$  is the reflectance coefficient.  $[F(R_\infty)hv]^2$  is plotted against  $hv$  according to the Tauc method, from which the energy bandgap is determined to be  $\sim 4.07$  eV.

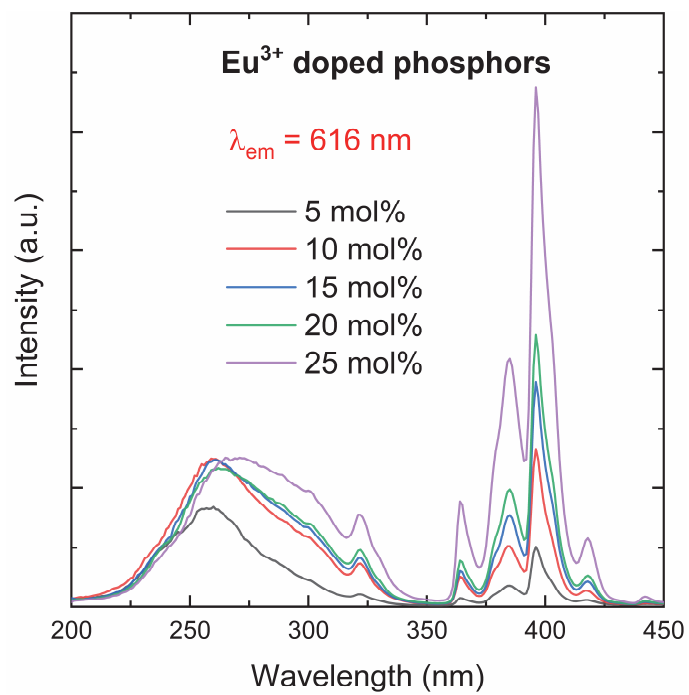

**Fig. S2** Excitation spectra of Eu<sup>3+</sup> doped Ba<sub>3</sub>YB<sub>3</sub>O<sub>9</sub> phosphors monitored at 616 nm.

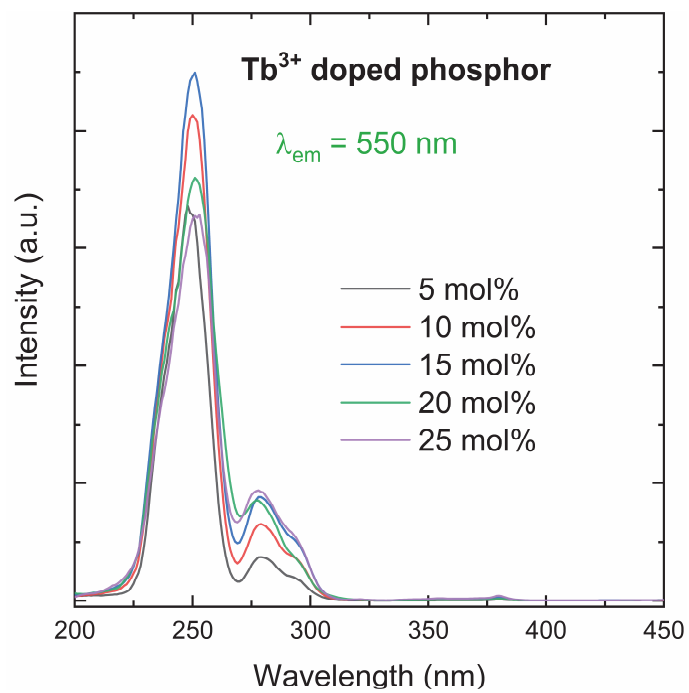

**Fig. S3** Excitation spectra of Tb<sup>3+</sup> doped Ba<sub>3</sub>YB<sub>3</sub>O<sub>9</sub> phosphors monitored at 550 nm.

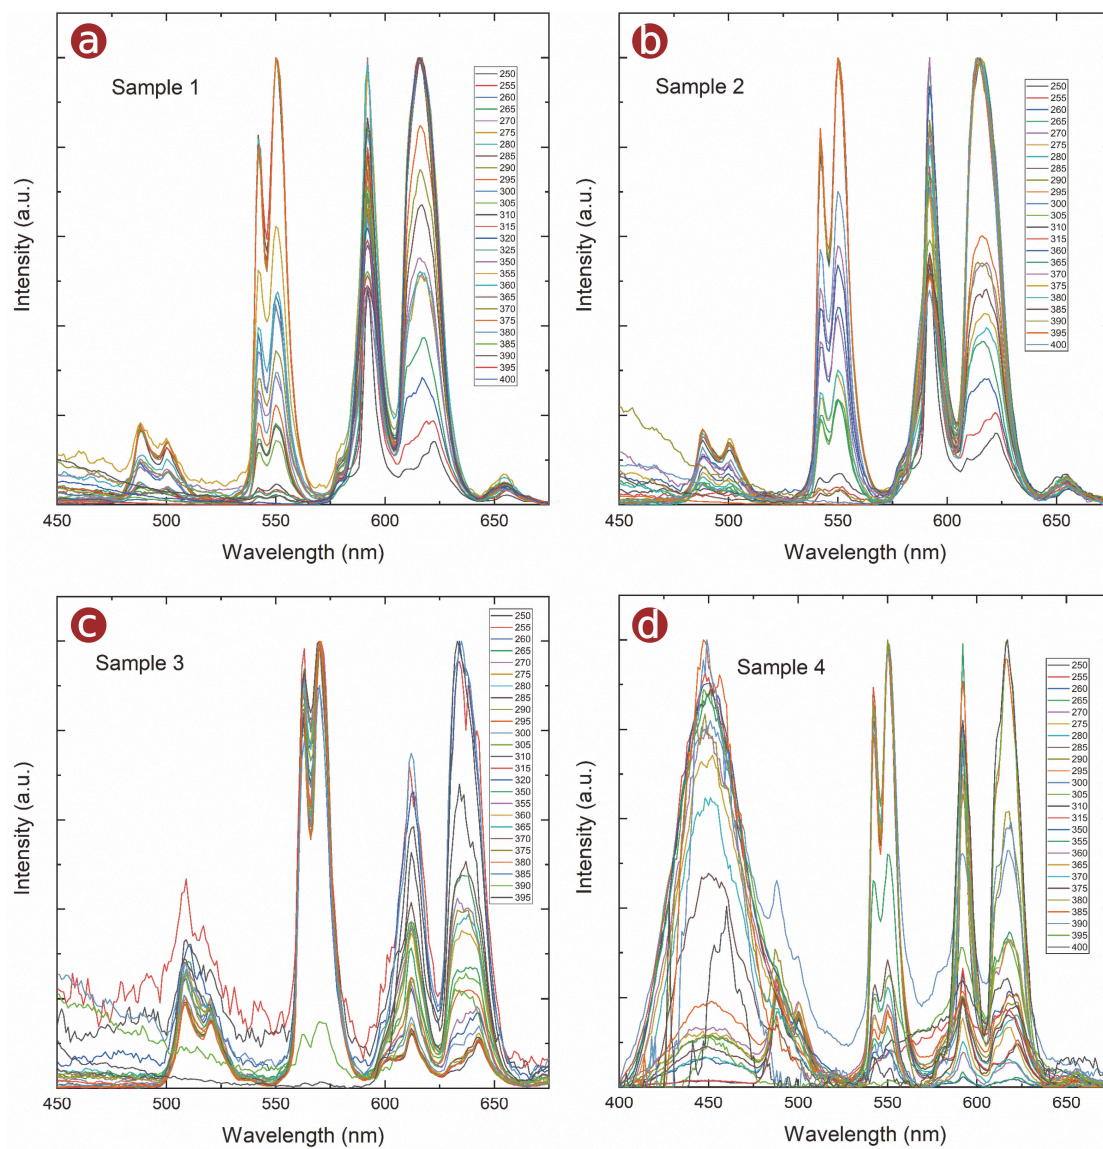

**Fig. S4** (a)-(d) Emission spectra of prepared PCPs under various excitation wavelengths.

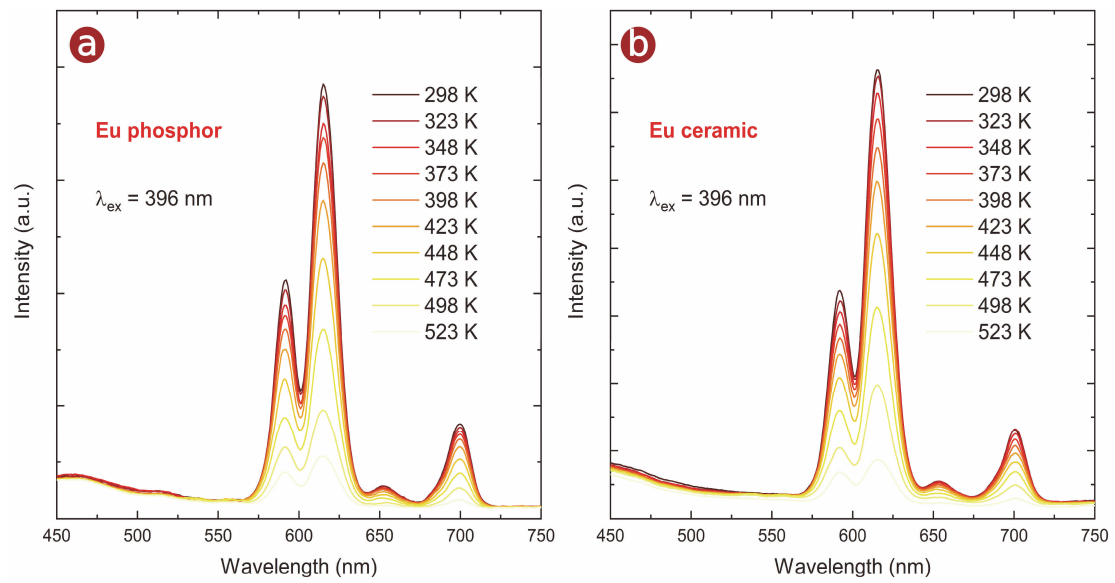

**Fig. S5** (a) Emission spectra of Eu<sup>3+</sup> doped Ba<sub>3</sub>YB<sub>3</sub>O<sub>9</sub> phosphor and (b) PCP measured from 298 to 523 K.

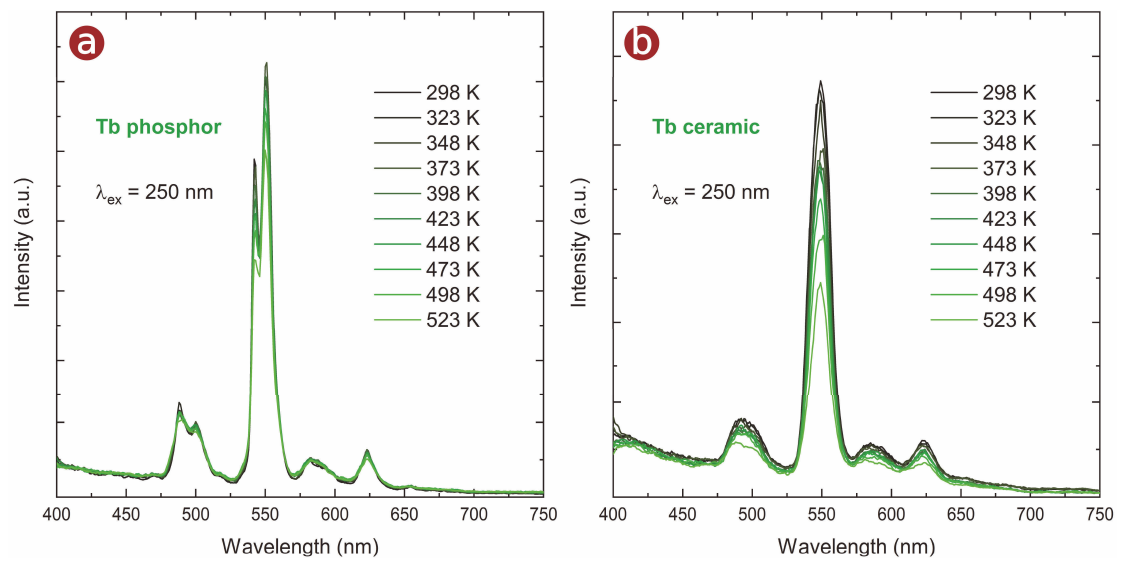

**Fig. S6** (a) Emission spectra of  $\text{Tb}^{3+}$  doped  $\text{Ba}_3\text{YB}_3\text{O}_9$  phosphor and (b) PCP measured from 298 to 523 K.

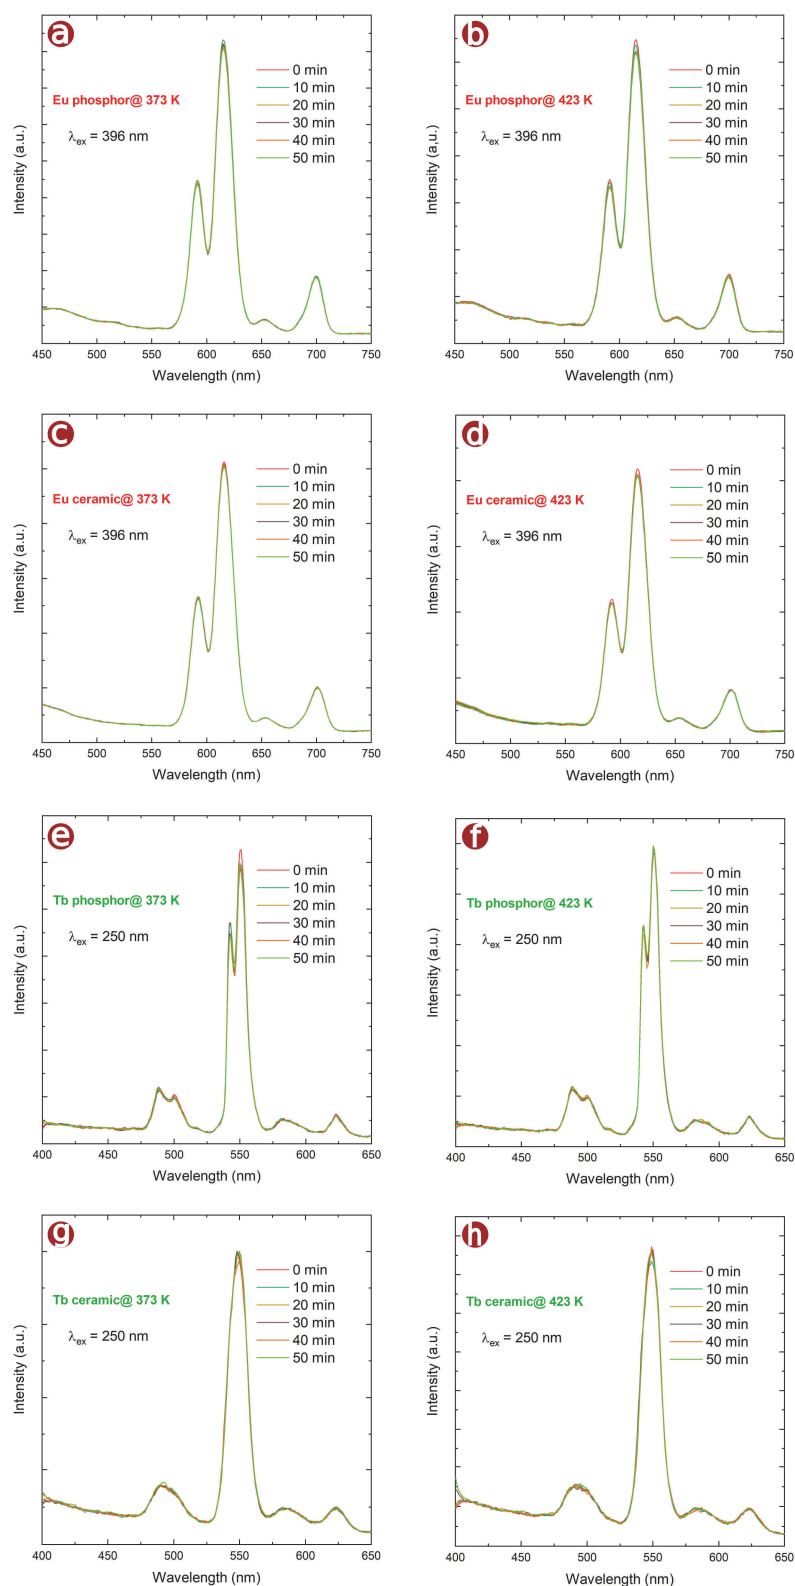

**Fig. S7** (a)-(d) Emission spectra of  $\text{Eu}^{3+}$  doped  $\text{Ba}_3\text{YB}_3\text{O}_9$  phosphor and PCP heated at 373 and 423 K in a time period of 0-50 mins. (e)-(h) Emission spectra of  $\text{Tb}^{3+}$  doped  $\text{Ba}_3\text{YB}_3\text{O}_9$  phosphor and PCP heated at 373 and 423 K in a time period of 0-50 mins.



**Table. S1** Atomic parameters for Ba<sub>3</sub>YB<sub>3</sub>O<sub>9</sub>: 0.05 Eu<sup>3+</sup>

| Atom | Wyck. | x/a     | y/b     | z/c     | S.O.F | U <sub>iso</sub> |
|------|-------|---------|---------|---------|-------|------------------|
| Ba1  | 6c    | 0.34808 | 0       | 0.44010 | 1     | 0.00179          |
| Ba2  | 6c    | 0.32900 | 0       | 0.20013 | 1     | 0.00584          |
| Ba3  | 2a    | 0       | 0       | 0.34264 | 1     | 0.00126          |
| Ba4  | 4b    | 0.66670 | 0.3333  | 0.29915 | 1     | 0.00242          |
| Y1   | 4b    | 0.33330 | 0.6667  | 0.56838 | 0.873 | 0.00192          |
| Eu1  | 4b    | 0.33330 | 0.6667  | 0.56838 | 0.127 | 0.00192          |
| Y2   | 2a    | 0       | 0       | 0.56316 | 0.632 | 0.00141          |
| Eu2  | 2a    | 0       | 0       | 0.56316 | 0.368 | 0.00141          |
| B1   | 6c    | 0       | 0.60842 | 0.48516 | 1     | 0.00651          |
| B2   | 6c    | 0.64228 | 0.64228 | 0.64889 | 1     | -0.00932         |
| B3   | 6c    | 0       | 0.70095 | 0.32352 | 1     | -0.00282         |
| O1   | 12d   | 0.30936 | 0.47134 | 0.50209 | 1     | 0.00312          |
| O2   | 12d   | 0.53795 | 0.6924  | 0.66200 | 1     | 0.00182          |
| O3   | 6c    | 0       | 0.79856 | 0.49551 | 1     | 0.00245          |
| O4   | 6c    | 0       | 0.1945  | 0.65813 | 1     | 0.00111          |
| O5   | 12d   | 0.12952 | 0.8352  | 0.31869 | 1     | 0.00213          |
| O6   | 6c    | 0.52824 | 0       | 0.30847 | 1     | 0.00328          |

**Table. S2** Atomic parameters for Ba<sub>3</sub>YB<sub>3</sub>O<sub>9</sub>: 0.25 Eu<sup>3+</sup>

| Atom | Wyck. | x/a     | y/b     | z/c     | S.O.F | U <sub>iso</sub> |
|------|-------|---------|---------|---------|-------|------------------|
| Ba1  | 6c    | 0.36095 | 0       | 0.47027 | 1     | 0.00212          |
| Ba2  | 6c    | 0.33223 | 0       | 0.22814 | 1     | 0.00176          |
| Ba3  | 2a    | 0       | 0       | 0.37201 | 1     | 0.00176          |
| Ba4  | 4b    | 0.66670 | 0.33330 | 0.32818 | 1     | 0.00176          |
| Y1   | 4b    | 0.33330 | 0.66670 | 0.58813 | 0.615 | 0.00182          |
| Eu1  | 4b    | 0.33330 | 0.66670 | 0.58813 | 0.385 | 0.00182          |
| Y2   | 2a    | 0       | 0       | 0.57569 | 0.574 | 0.00174          |
| Eu2  | 2a    | 0       | 0       | 0.57569 | 0.426 | 0.00174          |
| B1   | 6c    | 0       | 0.68365 | 0.47645 | 1     | 0.00492          |
| B2   | 6c    | 0.65835 | 0.65835 | 0.61818 | 1     | 0.01308          |
| B3   | 6c    | 0       | 0.67814 | 0.35418 | 1     | -0.00155         |
| O1   | 12d   | 0.31450 | 0.47841 | 0.44318 | 1     | 0.00173          |
| O2   | 12d   | 0.57847 | 0.65603 | 0.67974 | 1     | 0.00176          |
| O3   | 6c    | 0       | 0.86732 | 0.51979 | 1     | 0.00176          |
| O4   | 6c    | 0       | 0.15358 | 0.68996 | 1     | 0.00176          |
| O5   | 12d   | 0.15576 | 0.87588 | 0.32314 | 1     | 0.01825          |
| O6   | 6c    | 0.52775 | 0       | 0.33424 | 1     | -0.00206         |

**Table. S3** The bond length ( $d_{av}$ ) for Y/Eu-O and lattice distortion index ( $D$ ) for the undoped Ba<sub>3</sub>YB<sub>3</sub>O<sub>9</sub> sample.

| Bond | $d_{av}$ | $D$     |
|------|----------|---------|
| Y1-O | 2.21091  | 0.01716 |
| Y2-O | 2.24067  | 0.002   |

**Table. S4** The bond length ( $d_{av}$ ) for Y/Eu-O and lattice distortion index ( $D$ ) for the Ba<sub>3</sub>YB<sub>3</sub>O<sub>9</sub>: 0.05 Eu<sup>3+</sup> sample.

| Bond | $d_{av}$ | $D$     |
|------|----------|---------|
| Y1-O | 2.24066  | 0.01765 |
| Y2-O | 2.24993  | 0.01203 |

**Table. S5** The bond length ( $d_{av}$ ) for Y/Eu-O and lattice distortion index ( $D$ ) for the Ba<sub>3</sub>YB<sub>3</sub>O<sub>9</sub>: 0.25 Eu<sup>3+</sup> sample.

| Bond | $d_{av}$ | $D$     |
|------|----------|---------|
| Y1-O | 2.32374  | 0.03497 |
| Y2-O | 2.36638  | 0.03323 |

**Table. S6** Comparison of thermal stability for the reported  $\text{Eu}^{3+}$  and  $\text{Tb}^{3+}$  doped materials and the synthesized  $\text{Eu}^{3+}$  and  $\text{Tb}^{3+}$  doped  $\text{Ba}_3\text{YB}_3\text{O}_9$  samples.

| Host                                                                                  | Activated ions   | Heating temperature | Residual intensity | Literature |
|---------------------------------------------------------------------------------------|------------------|---------------------|--------------------|------------|
| $\text{Sr}_{1.7}\text{Zn}_{0.3}\text{CeO}_4$                                          | $\text{Eu}^{3+}$ | 423 K               | ~ 36%              | 1          |
| $\text{MgY}_4\text{Si}_3\text{O}_{13}$                                                | $\text{Eu}^{3+}$ | 423 K               | ~ 45%              | 2          |
| $\text{LaBWO}_6$                                                                      | $\text{Eu}^{3+}$ | 423 K               | ~ 57%              | 3          |
| $\text{Na}_3\text{Sc}_2(\text{PO})_4$                                                 | $\text{Eu}^{3+}$ | 423 K               | ~ 73%              | 4          |
| $\text{Ba}_3\text{YB}_3\text{O}_9$ phosphor                                           | $\text{Eu}^{3+}$ | 423 K               | ~ 81%              | This work  |
| $\text{Ba}_3\text{YB}_3\text{O}_9$ PCP                                                | $\text{Eu}^{3+}$ | 423 K               | ~ 81%              | This work  |
| $\text{LaAl}_{2.03}\text{B}_4\text{O}_{10.54}$                                        | $\text{Tb}^{3+}$ | 423 K               | ~ 28%              | 5          |
| $\text{Li}_3\text{Sc}_2(\text{PO}_4)_3$                                               | $\text{Tb}^{3+}$ | 423 K               | ~ 47%              | 6          |
| $\text{Ca}(\text{Mg}_{0.8}\text{Al}_{0.2})(\text{Si}_{1.8}\text{Al}_{0.2})\text{O}_6$ | $\text{Tb}^{3+}$ | 423 K               | ~ 64%              | 7          |
| $\text{Ca}_3\text{Gd}(\text{GaO})_3(\text{BO}_3)_4$                                   | $\text{Tb}^{3+}$ | 423 K               | ~ 70%              | 8          |
| $\text{Ba}_3\text{YB}_3\text{O}_9$ phosphor                                           | $\text{Tb}^{3+}$ | 423 K               | ~ 97%              | This work  |
| $\text{Ba}_3\text{YB}_3\text{O}_9$ PCP                                                | $\text{Tb}^{3+}$ | 423 K               | ~ 83%              | This work  |

## References

- 1 H. Li, R. Zhao, Y. Jia, W. Sun, J. Fu, L. Jiang, S. Zhang, R. Pang and C. Li, *ACS Appl. Mater. Interfaces*, 2014, **6**, 3163-3169.
- 2 Z. Ci, R. Guan, K. Nie, L. Liu, L. Han, J. Zhang and Y. Wang, *J. Am. Ceram. Soc.*, 2015, **98**, 2488-2492.
- 3 B. Li, X. Huang, H. Guo and Y. Zeng, *Dyes Pigm.*, 2018, **150**, 67-72.
- 4 H. Guo, X. Huang and Y. Zeng, *J. Alloys Compd.*, 2018, **741**, 300-306.
- 5 F. Junqin, J. Cao, Z. Li, Z. Li, J. Li, J. Lin, W. Li, Z. Mu and F. Wu, *Ceram. Int.*, 2019, **45**, 20316-20322.
- 6 M. Jiao, Q. Xu, M. Liu, C. Yang and Y. Yu, *Phys. Chem. Chem. Phys.*, 2018, **20**, 26995-27002.
- 7 Z. An, S. Che, Y. Song, X. Zhang, R. Dong, D. Zhang, X. Zhou, Z. Shi and H. Zou, *Inorg. Chem.*, 2020, **59**, 4790-4799.
- 8 B. Li and X. Huang, *Ceram. Int.*, 2018, **44**, 4915-4923.
